# Supplementary material
Source: PubMed Central journal article supplement (PMC5461542)
Supplement: 10.1074_M116.064980_mcp.M116.064980-2.pdf [file 10.1074_M116.064980_mcp.M116.064980-2.pdf]

**Table S1.** Comparison between expression and activation of proteins known to play a role in canonical FGF signaling and that of RCS cells.

| <b>Proteins implicated in FGF signaling</b> | <b>Expression RCS cells*</b> | <b>Identified Phosphopeptides</b> | <b>Log2 Difference in intensity***</b> |
|---------------------------------------------|------------------------------|-----------------------------------|----------------------------------------|
| FGFR1                                       | yes                          | no                                |                                        |
| FGFR2                                       | no                           | n/a                               |                                        |
| <b>FGFR3</b>                                | yes**                        | QVSLESNSSMNSNTPLVR                | -1.18                                  |
| FGFR4                                       | no                           | n/a                               |                                        |
| HRAS                                        | yes                          | no                                |                                        |
| KRAS                                        | yes                          | no                                |                                        |
| NRAS                                        | yes                          | no                                |                                        |
| <b>RRAS2</b>                                | yes                          | FQEQECPPSPEPTR                    | -1.1                                   |
| <b>FRS2</b>                                 | yes**                        | HNSTDLP                           | -2.32                                  |
| RASA1                                       | yes                          | no                                |                                        |
| RASA2                                       | yes                          | no                                |                                        |
| <b>RASA3</b>                                | yes                          | QQSEISTHSI                        | -2.08                                  |
| RASA4                                       | yes                          | no                                |                                        |
| <b>RAF1</b>                                 | yes**                        | STSTPNVHVMVSTTLPVDSR              | -0.82                                  |
| MAP3K2                                      | yes                          | no                                |                                        |
| <b>MAP3K3</b>                               | yes                          | LRSADSENALTVQER                   | -0.98                                  |
|                                             |                              | SADSENALTVQER                     | -1.85                                  |
| MAP3K4                                      | yes                          | no                                |                                        |
| MAP3K5                                      | no                           | n/a                               |                                        |
| <b>MAP3K7</b>                               | yes                          | MSADMSEIEAR                       | -1.57                                  |
| <b>GRB2</b>                                 | yes                          | no                                |                                        |
| <b>RAC1</b>                                 | yes                          | no                                |                                        |
| RALA                                        | yes                          | no                                |                                        |
| RALB                                        | yes                          | no                                |                                        |
| <b>RALBP1</b>                               | yes                          | RTEGYAAFQEDSSGDEAESPSK            | -1.19                                  |
| RALGDS                                      | no                           |                                   |                                        |
| CDC42                                       | yes                          | no                                |                                        |
| MAP2K1                                      | yes                          | no                                |                                        |
| MAP2K2                                      | yes                          | no                                |                                        |
| MAP2K3                                      | no                           | n/a                               |                                        |
| <b>MAP2K4</b>                               | yes                          | ILDQMPATPSSPMYVD                  | 1.18                                   |
| MAP2K5                                      | yes                          | no                                |                                        |

|               |       |                |       |
|---------------|-------|----------------|-------|
| MAP2K6        | yes   | no             |       |
| MAPK1         | yes** | no             |       |
| MAPK3         | yes** | no             |       |
| MAPK8         | yes** | no             |       |
| MAPK9         | yes   | no             |       |
| MAPK10        | no    | n/a            |       |
| MAPK11        | no    | n/a            |       |
| MAPK12        | no    | n/a            |       |
| MAPK13        | no    | n/a            |       |
| <b>MAPK14</b> | yes** | HTDDEMTGYVATR  | -1.52 |
| PLD1          | yes   | no             |       |
| PLD2          | yes   | no             |       |
| PLD3          | yes   | no             |       |
| <b>PLCG1</b>  | yes** | ENGDLSPFSGTSLR | -2.24 |
| PLCG2         | yes   | no             |       |
| ITPR1         | yes   | no             |       |
| ITPR2         | yes   | no             |       |
| ITPR3         | yes   | no             |       |
| <b>PRKCA</b>  | yes   | STLNPQWNESFTFK | -1.57 |
| PRKCD         | yes   | no             |       |
| PRKCE         | yes   | no             |       |
| PRKCI         | yes   | no             |       |
| PRKCSH        | yes   | no             |       |
| <b>PRKD1</b>  | yes   | RLSNVSLTGLGTVR | -1.35 |
| <b>PRKD3</b>  | yes   | no             |       |
| <b>SOS1</b>   | yes   | DGPPLLENAHSS   | -0.84 |
| <b>SOS2</b>   | yes   | no             |       |
| PIK3R1        | yes   | no             |       |
| PIK3R2        | yes   | no             |       |
| PIK3R3        | yes   | no             |       |
| PIK3R4        | yes   | no             |       |
| PIK3R5        | no    | n/a            |       |
| <b>ATF2</b>   | yes** | no             |       |

\* Detected in this study

\*\* confirm by immunoblotting in this study or elsewhere.

\*\*\*Difference in the intensity of phosphopeptides compared to control.

n/a - not applicable

**Table S2.** GO category enrichment analysis of the FGFome (untreated cells compared to 2 and 8 hrs FGF1 treatment)

| UNIPROT<br>ACCESSION<br>NUMBER | GENE NAME                                                                                                                                  |
|--------------------------------|--------------------------------------------------------------------------------------------------------------------------------------------|
| <b>2 hours</b>                 | <b><u>Transcription regulation</u></b>                                                                                                     |
| 397728                         | CBF1 interacting corepressor                                                                                                               |
| 412786                         | ESF1, nucleolar pre-rRNA processing protein, homolog ( <i>S. cerevisiae</i> )                                                              |
| 390968                         | Jun oncogene                                                                                                                               |
| 392680                         | Leo1, Paf1/RNA polymerase II complex component, homolog ( <i>S. cerevisiae</i> )                                                           |
| 378769                         | MYB binding protein (P160) 1a                                                                                                              |
| 410755                         | PC4 and SFRS1 interacting protein 1                                                                                                        |
| 391452                         | TAF6 RNA polymerase II, TATA box binding protein (TBP)-associated factor                                                                   |
| 394133                         | WNK lysine deficient protein kinase 4; vacuolar protein sorting 25 homolog ( <i>S. cerevisiae</i> ); cyclin N-terminal domain containing 1 |
| 381844                         | Y box binding protein 1                                                                                                                    |
| 400118                         | arginine-glutamic acid dipeptide (RE) repeats                                                                                              |
| 402470                         | basic leucine zipper and W2 domains 1                                                                                                      |
| 387600                         | catenin (cadherin associated protein), beta 1                                                                                              |
| 415934                         | cell division cycle associated 7                                                                                                           |
| 404215                         | coiled-coil and C2 domain containing 1A                                                                                                    |
| 394530                         | cold shock domain protein A                                                                                                                |
| 381955                         | cullin-associated and neddylation-dissociated 1                                                                                            |
| 407748                         | forkhead box C2                                                                                                                            |
| 417456                         | general transcription factor IIF, polypeptide 1                                                                                            |
| 387121                         | glucocorticoid receptor DNA binding factor 1                                                                                               |
| 410521                         | hepatoma-derived growth factor                                                                                                             |
| 383170                         | high mobility group AT-hook 1                                                                                                              |
| 388418                         | interferon regulatory factor 3; serine/threonine kinase 22 substrate 1                                                                     |
| 381744                         | interleukin enhancer binding factor 3                                                                                                      |
| 397677                         | leucine rich repeat (in FLII) interacting protein 1                                                                                        |
| 412480                         | mediator complex subunit 24                                                                                                                |
| 417264                         | nuclear factor I/C                                                                                                                         |
| 416382                         | nuclear receptor co-repressor 1                                                                                                            |
| 395840                         | purine rich element binding protein B                                                                                                      |
| 404715                         | ribosomal RNA processing 8, methyltransferase, homolog (yeast)                                                                             |
| 408388                         | scaffold attachment factor B                                                                                                               |
| 417213                         | siah binding protein 1; FBP interacting repressor; pyrimidine tract binding splicing factor; Ro ribonucleoprotein-binding protein 1        |
| 400320                         | similar to thyroid hormone receptor associated protein 3; thyroid hormone receptor associated protein 3                                    |
| 385671                         | staphylococcal nuclease and tudor domain containing 1                                                                                      |

|        |                                                         |
|--------|---------------------------------------------------------|
| 408665 | structure specific recognition protein 1                |
| 410555 | timeless homolog (Drosophila)                           |
| 390930 | transcription elongation factor B (SIII), polypeptide 3 |
| 408228 | tripartite motif-containing 28                          |
| 412086 | zinc finger protein 148                                 |
| 408628 | zinc finger protein 394                                 |
| 409371 | zinc fingers and homeoboxes 1                           |

### **Regulation of cellular response to stress**

|        |                                                          |
|--------|----------------------------------------------------------|
| 393186 | DIX domain containing 1                                  |
| 412842 | mitogen activated protein kinase kinase kinase 7         |
| 401843 | multiple endocrine neoplasia 1                           |
| 393276 | nuclear distribution gene E-like homolog 1 (A. nidulans) |
| 416382 | nuclear receptor co-repressor 1                          |
| 412548 | p21 protein (Cdc42/Rac)-activated kinase 1               |
| 409190 | programmed cell death 4                                  |
| 397143 | secreted phosphoprotein 1                                |
| 416856 | v-akt murine thymoma viral oncogene homolog 1            |
| 396002 | v-crk sarcoma virus CT10 oncogene homolog (avian)        |

### **Organelle lumen**

|        |                                                                                                       |
|--------|-------------------------------------------------------------------------------------------------------|
| 397728 | CBF1 interacting corepressor                                                                          |
| 414454 | DEAD (Asp-Glu-Ala-Asp) box polypeptide 21                                                             |
| 405760 | DEAD (Asp-Glu-Ala-Asp) box polypeptide 24                                                             |
| 412786 | ESF1, nucleolar pre-rRNA processing protein, homolog (S. cerevisiae)                                  |
| 409149 | FUS interacting protein (serine-arginine rich) 1                                                      |
| 394075 | FtsJ homolog 3 (E. coli)                                                                              |
| 383038 | G protein-coupled receptor kinase interacting ArfGAP 2                                                |
| 390968 | Jun oncogene                                                                                          |
| 410307 | La ribonucleoprotein domain family, member 7                                                          |
| 392680 | Leo1, Paf1/RNA polymerase II complex component, homolog (S. cerevisiae)                               |
| 378769 | MYB binding protein (P160) 1a                                                                         |
| 394586 | PTK2 protein tyrosine kinase 2                                                                        |
| 413832 | RD RNA-binding protein                                                                                |
| 405897 | RNA (guanine-7-) methyltransferase                                                                    |
| 406827 | RRS1 ribosome biogenesis regulator homolog (S. cerevisiae)                                            |
| 401399 | SFRS protein kinase 2                                                                                 |
| 391452 | TAF6 RNA polymerase II, TATA box binding protein (TBP)-associated factor                              |
| 392843 | aldolase A, fructose-bisphosphate; similar to Fructose-bisphosphate aldolase A (Muscle-type aldolase) |
| 408863 | apoptosis antagonizing transcription factor                                                           |
| 405621 | calumenin                                                                                             |
| 386379 | cancer susceptibility candidate 3                                                                     |

|        |                                                                                                                                                                                          |
|--------|------------------------------------------------------------------------------------------------------------------------------------------------------------------------------------------|
| 387600 | catenin (cadherin associated protein), beta 1                                                                                                                                            |
| 415207 | cell division cycle 2, G1 to S and G2 to M                                                                                                                                               |
| 416513 | chromatin assembly factor 1, subunit B (p60)                                                                                                                                             |
| 404215 | coiled-coil and C2 domain containing 1A                                                                                                                                                  |
| 386938 | cyclin dependent kinase 2                                                                                                                                                                |
| 388567 | dual specificity phosphatase 6                                                                                                                                                           |
| 395345 | enhancer of zeste homolog 2 (Drosophila)                                                                                                                                                 |
| 417456 | general transcription factor IIF, polypeptide 1                                                                                                                                          |
| 383563 | heterogeneous nuclear ribonucleoprotein H1                                                                                                                                               |
| 400114 | heterogeneous nuclear ribonucleoprotein K                                                                                                                                                |
| 403975 | inhibitor of growth family, member 5                                                                                                                                                     |
| 388418 | interferon regulatory factor 3; serine/threonine kinase 22 substrate 1                                                                                                                   |
| 381744 | interleukin enhancer binding factor 3                                                                                                                                                    |
| 412480 | mediator complex subunit 24                                                                                                                                                              |
| 393441 | mediator of DNA damage checkpoint 1                                                                                                                                                      |
| 395663 | metastasis associated 1                                                                                                                                                                  |
| 415416 | mevalonate (diphospho) decarboxylase                                                                                                                                                     |
| 387335 | mitogen activated protein kinase 14                                                                                                                                                      |
| 401843 | multiple endocrine neoplasia 1                                                                                                                                                           |
| 404408 | myeloid cell leukemia sequence 1                                                                                                                                                         |
| 416217 | nuclear fragile X mental retardation protein interacting protein 1                                                                                                                       |
| 416382 | nuclear receptor co-repressor 1                                                                                                                                                          |
| 406024 | nucleoporin 153                                                                                                                                                                          |
| 412291 | nucleoporin 98kDa                                                                                                                                                                        |
| 390682 | peptidylprolyl isomerase G                                                                                                                                                               |
| 379682 | pseudouridylate synthase 1                                                                                                                                                               |
| 404715 | ribosomal RNA processing 8, methyltransferase, homolog (yeast)                                                                                                                           |
| 393619 | similar to Heterogeneous nuclear ribonucleoprotein A1 (Helix-destabilizing protein) (Single-strand binding protein) (hnRNP core protein A1) (HDP-1) (Topoisomerase-inhibitor suppressed) |
| 405950 | similar to heterogeneous nuclear ribonucleoprotein H2; heterogeneous nuclear ribonucleoprotein H2 (H')                                                                                   |
| 400320 | similar to thyroid hormone receptor associated protein 3; thyroid hormone receptor associated protein 3                                                                                  |
| 408665 | structure specific recognition protein 1                                                                                                                                                 |
| 409957 | survival motor neuron 1                                                                                                                                                                  |
| 411072 | telomeric repeat binding factor 2, interacting protein                                                                                                                                   |
| 389354 | topoisomerase (DNA) II alpha                                                                                                                                                             |
| 390930 | transcription elongation factor B (SIII), polypeptide 3                                                                                                                                  |
| 408228 | tripartite motif-containing 28                                                                                                                                                           |
| 385736 | tuftelin interacting protein 11                                                                                                                                                          |
| 416856 | v-akt murine thymoma viral oncogene homolog 1                                                                                                                                            |

### **Negative regulation of cellular biosynthetic process**

|        |                                                                        |
|--------|------------------------------------------------------------------------|
| 414236 | BCL2-associated transcription factor 1                                 |
| 397728 | CBF1 interacting corepressor                                           |
| 378769 | MYB binding protein (P160) 1a                                          |
| 391544 | SRY (sex determining region Y)-box 6                                   |
| 381844 | Y box binding protein 1                                                |
| 408863 | apoptosis antagonizing transcription factor                            |
| 387600 | catenin (cadherin associated protein), beta 1                          |
| 394530 | cold shock domain protein A                                            |
| 417931 | eukaryotic translation initiation factor 2 alpha kinase 3              |
| 380670 | eukaryotic translation initiation factor 4E binding protein 1          |
| 387121 | glucocorticoid receptor DNA binding factor 1                           |
| 391060 | hexamethylene bis-acetamide inducible 2                                |
| 410038 | inositol polyphosphate phosphatase-like 1                              |
| 381744 | interleukin enhancer binding factor 3                                  |
| 401843 | multiple endocrine neoplasia 1                                         |
| 379358 | neural precursor cell expressed, developmentally down-regulated gene 4 |
| 417264 | nuclear factor I/C                                                     |
| 416382 | nuclear receptor co-repressor 1                                        |
| 409190 | programmed cell death 4                                                |
| 381585 | protein kinase C, alpha                                                |
| 395840 | purine rich element binding protein B                                  |
| 410555 | timeless homolog (Drosophila)                                          |
| 408228 | tripartite motif-containing 28                                         |
| 412086 | zinc finger protein 148                                                |
| 409371 | zinc fingers and homeoboxes 1                                          |

### **mRNA processing**

|        |                                                                                                                                     |
|--------|-------------------------------------------------------------------------------------------------------------------------------------|
| 397728 | CBF1 interacting corepressor                                                                                                        |
| 409149 | FUS interacting protein (serine-arginine rich) 1                                                                                    |
| 405897 | RNA (guanine-7-) methyltransferase                                                                                                  |
| 401399 | SFRS protein kinase 2                                                                                                               |
| 412589 | SR-related CTD-associated factor 1                                                                                                  |
| 381844 | Y box binding protein 1                                                                                                             |
| 386379 | cancer susceptibility candidate 3                                                                                                   |
| 417456 | general transcription factor IIF, polypeptide 1                                                                                     |
| 383563 | heterogeneous nuclear ribonucleoprotein H1                                                                                          |
| 400114 | heterogeneous nuclear ribonucleoprotein K                                                                                           |
| 383397 | serine/arginine repetitive matrix 1                                                                                                 |
| 417213 | siah binding protein 1; FBP interacting repressor; pyrimidine tract binding splicing factor; Ro ribonucleoprotein-binding protein 1 |

|        |                                                                                                                                                                                          |
|--------|------------------------------------------------------------------------------------------------------------------------------------------------------------------------------------------|
| 393619 | similar to Heterogeneous nuclear ribonucleoprotein A1 (Helix-destabilizing protein) (Single-strand binding protein) (hnRNP core protein A1) (HDP-1) (Topoisomerase-inhibitor suppressed) |
| 405950 | similar to heterogeneous nuclear ribonucleoprotein H2; heterogeneous nuclear ribonucleoprotein H2 (H')                                                                                   |
| 378848 | snurportin 1                                                                                                                                                                             |
| 396533 | squamous cell carcinoma antigen recognized by T cells                                                                                                                                    |
| 409957 | survival motor neuron 1                                                                                                                                                                  |
| 399853 | transformer-2 alpha                                                                                                                                                                      |
| 385736 | tuftelin interacting protein 11                                                                                                                                                          |
| 394598 | zinc finger protein 36                                                                                                                                                                   |

**Regulation of microtubule cytoskeleton organization**

|        |                                                        |
|--------|--------------------------------------------------------|
| 404077 | Rho-associated coiled-coil containing protein kinase 2 |
| 387600 | catenin (cadherin associated protein), beta 1          |
| 406043 | cytoplasmic linker associated protein 2                |
| 404036 | microtubule-associated protein 1A                      |
| 403480 | microtubule-associated protein 2                       |
| 413797 | microtubule-associated protein 4                       |
| 386914 | stathmin 1                                             |

**Protein serine/threonine kinase activity**

|        |                                                                                                                           |
|--------|---------------------------------------------------------------------------------------------------------------------------|
| 381742 | 3-phosphoinositide dependent protein kinase-1                                                                             |
| 384853 | AP2 associated kinase 1                                                                                                   |
| 413259 | CDC42 binding protein kinase alpha                                                                                        |
| 405354 | MAP/microtubule affinity-regulating kinase 2                                                                              |
| 398689 | PAS domain containing serine/threonine kinase                                                                             |
| 404077 | Rho-associated coiled-coil containing protein kinase 2                                                                    |
| 401399 | SFRS protein kinase 2                                                                                                     |
| 394133 | WNK lysine deficient protein kinase 4; similar to Vacuolar protein sorting protein 25 (ELL-associated protein of 20 kDa); |
| 378637 | casein kinase 1, alpha 1                                                                                                  |
| 415207 | cell division cycle 2, G1 to S and G2 to M                                                                                |
| 394418 | cyclin D3                                                                                                                 |
| 386938 | cyclin dependent kinase 2                                                                                                 |
| 417931 | eukaryotic translation initiation factor 2 alpha kinase 3                                                                 |
| 387335 | mitogen activated protein kinase 14                                                                                       |
| 412608 | mitogen activated protein kinase kinase kinase 3                                                                          |
| 412842 | mitogen activated protein kinase kinase kinase 7                                                                          |
| 412548 | p21 protein (Cdc42/Rac)-activated kinase 1                                                                                |
| 402273 | p21 protein (Cdc42/Rac)-activated kinase 2                                                                                |
| 381585 | protein kinase C, alpha                                                                                                   |
| 410666 | protein kinase D1                                                                                                         |
| 416856 | v-akt murine thymoma viral oncogene homolog 1                                                                             |
| 411274 | v-raf-leukemia viral oncogene 1                                                                                           |

**Negative regulation of protein kinase activity**

|        |                                               |
|--------|-----------------------------------------------|
| 381742 | 3-phosphoinositide dependent protein kinase-1 |
| 388567 | dual specificity phosphatase 6                |
| 391060 | hexamethylene bis-acetamide inducible 2       |
| 410038 | inositol polyphosphate phosphatase-like 1     |
| 401843 | multiple endocrine neoplasia 1                |
| 409190 | programmed cell death 4                       |
| 381585 | protein kinase C, alpha                       |
| 416856 | v-akt murine thymoma viral oncogene homolog 1 |

**Regulation of phosphorylation**

|        |                                                                          |
|--------|--------------------------------------------------------------------------|
| 381742 | 3-phosphoinositide dependent protein kinase-1                            |
| 402133 | ATPase, Cu <sup>++</sup> transporting, alpha polypeptide                 |
| 389158 | B-cell CLL/lymphoma 10; dimethylarginine dimethylaminohydrolase 1        |
| 390968 | Jun oncogene                                                             |
| 394418 | cyclin D3                                                                |
| 388567 | dual specificity phosphatase 6                                           |
| 391060 | hexamethylene bis-acetamide inducible 2                                  |
| 410038 | inositol polyphosphate phosphatase-like 1                                |
| 382720 | insulin receptor substrate 1                                             |
| 395935 | lysophosphatidic acid receptor 1                                         |
| 412842 | mitogen activated protein kinase kinase kinase 7                         |
| 401843 | multiple endocrine neoplasia 1                                           |
| 412548 | p21 protein (Cdc42/Rac)-activated kinase 1                               |
| 389525 | presenilin 2; chaperone, ABC1 activity of bc1 complex homolog (S. pombe) |
| 409190 | programmed cell death 4                                                  |
| 381585 | protein kinase C, alpha                                                  |
| 395198 | protein kinase, cAMP dependent regulatory, type II beta                  |
| 415680 | protein tyrosine phosphatase, non-receptor type 11                       |
| 416856 | v-akt murine thymoma viral oncogene homolog 1                            |
| 396002 | v-crk sarcoma virus CT10 oncogene homolog (avian)                        |

**Negative regulation of transcription**

|        |                                               |
|--------|-----------------------------------------------|
| 414236 | BCL2-associated transcription factor 1        |
| 397728 | CBF1 interacting corepressor                  |
| 378769 | MYB binding protein (P160) 1a                 |
| 391544 | SRY (sex determining region Y)-box 6          |
| 381844 | Y box binding protein 1                       |
| 387600 | catenin (cadherin associated protein), beta 1 |
| 394530 | cold shock domain protein A                   |
| 387121 | glucocorticoid receptor DNA binding factor 1  |
| 391060 | hexamethylene bis-acetamide inducible 2       |

|        |                                                                        |
|--------|------------------------------------------------------------------------|
| 381744 | interleukin enhancer binding factor 3                                  |
| 401843 | multiple endocrine neoplasia 1                                         |
| 379358 | neural precursor cell expressed, developmentally down-regulated gene 4 |
| 417264 | nuclear factor I/C                                                     |
| 416382 | nuclear receptor co-repressor 1                                        |
| 409190 | programmed cell death 4                                                |
| 395840 | purine rich element binding protein B                                  |
| 410555 | timeless homolog (Drosophila)                                          |
| 408228 | tripartite motif-containing 28                                         |
| 412086 | zinc finger protein 148                                                |
| 409371 | zinc fingers and homeoboxes 1                                          |

**Positive regulation of cellular biosynthetic process**

|        |                                                                                                         |
|--------|---------------------------------------------------------------------------------------------------------|
| 89158  | B-cell CLL/lymphoma 10; dimethylarginine dimethylaminohydrolase 1                                       |
| 394340 | GC-rich promoter binding protein 1                                                                      |
| 390968 | Jun oncogene                                                                                            |
| 391544 | SRY (sex determining region Y)-box 6                                                                    |
| 381844 | Y box binding protein 1                                                                                 |
| 408863 | apoptosis antagonizing transcription factor                                                             |
| 387600 | catenin (cadherin associated protein), beta 1                                                           |
| 381955 | cullin-associated and neddylation-dissociated 1                                                         |
| 386938 | cyclin dependent kinase 2                                                                               |
| 417456 | general transcription factor IIF, polypeptide 1                                                         |
| 383170 | high mobility group AT-hook 1                                                                           |
| 403975 | inhibitor of growth family, member 5                                                                    |
| 382720 | insulin receptor substrate 1                                                                            |
| 381744 | interleukin enhancer binding factor 3                                                                   |
| 387335 | mitogen activated protein kinase 14                                                                     |
| 401843 | multiple endocrine neoplasia 1                                                                          |
| 417264 | nuclear factor I/C                                                                                      |
| 416217 | nuclear fragile X mental retardation protein interacting protein 1                                      |
| 379682 | pseudouridylate synthase 1                                                                              |
| 411565 | similar to heat shock protein 1, alpha; heat shock protein 90, alpha (cytosolic), class A member 1      |
| 400320 | similar to thyroid hormone receptor associated protein 3; thyroid hormone receptor associated protein 3 |
| 389354 | topoisomerase (DNA) II alpha                                                                            |
| 408228 | tripartite motif-containing 28                                                                          |
| 416856 | v-akt murine thymoma viral oncogene homolog 1                                                           |
| 412086 | zinc finger protein 148                                                                                 |
| 394598 | zinc finger protein 36                                                                                  |

**Cell projection morphogenesis**

|        |                                                          |
|--------|----------------------------------------------------------|
| 402133 | ATPase, Cu <sup>++</sup> transporting, alpha polypeptide |
| 394586 | PTK2 protein tyrosine kinase 2                           |

|        |                                                                   |
|--------|-------------------------------------------------------------------|
| 402458 | catenin (cadherin associated protein), alpha 1                    |
| 403707 | enabled homolog (Drosophila)                                      |
| 393276 | nuclear distribution gene E-like homolog 1 (A. nidulans)          |
| 401670 | numb homolog (Drosophila)                                         |
| 412548 | p21 protein (Cdc42/Rac)-activated kinase 1                        |
| 381585 | protein kinase C, alpha                                           |
| 415680 | protein tyrosine phosphatase, non-receptor type 11                |
| 385244 | spastic paraplegia 3A homolog (human)                             |
| 386914 | stathmin 1                                                        |
| 416635 | v-erb-b2 erythroblastic leukemia viral oncogene homolog 3 (avian) |

**Nuclear mRNA splicing, via spliceosome**

|        |                                                                                                                                                                                          |
|--------|------------------------------------------------------------------------------------------------------------------------------------------------------------------------------------------|
| 9149   | FUS interacting protein (serine-arginine rich) 1                                                                                                                                         |
| 401399 | SFRS protein kinase 2                                                                                                                                                                    |
| 381844 | Y box binding protein 1                                                                                                                                                                  |
| 417456 | general transcription factor IIF, polypeptide 1                                                                                                                                          |
| 400114 | heterogeneous nuclear ribonucleoprotein K                                                                                                                                                |
| 383397 | serine/arginine repetitive matrix 1                                                                                                                                                      |
| 393619 | similar to Heterogeneous nuclear ribonucleoprotein A1 (Helix-destabilizing protein) (Single-strand binding protein) (hnRNP core protein A1) (HDP-1) (Topoisomerase-inhibitor suppressed) |
| 405950 | similar to heterogeneous nuclear ribonucleoprotein H2; heterogeneous nuclear ribonucleoprotein H2 (H')                                                                                   |
| 378848 | snurportin 1                                                                                                                                                                             |
| 409957 | survival motor neuron 1                                                                                                                                                                  |
| 399853 | transformer-2 alpha                                                                                                                                                                      |

**Regulation of nervous system development**

|        |                                                           |
|--------|-----------------------------------------------------------|
| 393186 | DIX domain containing 1                                   |
| 394586 | PTK2 protein tyrosine kinase 2                            |
| 391362 | Rho guanine nucleotide exchange factor (GEF) 1            |
| 402458 | catenin (cadherin associated protein), alpha 1            |
| 417931 | eukaryotic translation initiation factor 2 alpha kinase 3 |
| 410038 | inositol polyphosphate phosphatase-like 1                 |
| 393276 | nuclear distribution gene E-like homolog 1 (A. nidulans)  |
| 401670 | numb homolog (Drosophila)                                 |
| 381585 | protein kinase C, alpha                                   |
| 416278 | reticulon 4                                               |
| 397143 | secreted phosphoprotein 1                                 |
| 391145 | signal-induced proliferation-associated 1 like 1          |

**Cytoplasmic dynein complex**

|        |                                           |
|--------|-------------------------------------------|
| 392533 | dynactin 1                                |
| 400342 | dynein cytoplasmic 1 intermediate chain 1 |
| 405038 | dynein cytoplasmic 1 intermediate chain 2 |

|                |                                                                      |
|----------------|----------------------------------------------------------------------|
| 386384         | dynein, cytoplasmic 1 light intermediate chain 2                     |
| <b>8 hours</b> | <b><u>Transcription regulation</u></b>                               |
| 412786         | ESF1, nucleolar pre-rRNA processing protein, homolog (S. cerevisiae) |
| 378769         | MYB binding protein (P160) 1a                                        |
| 383170         | high mobility group AT-hook 1                                        |
| 397677         | leucine rich repeat (in FLII) interacting protein 1                  |
| 410555         | timeless homolog (Drosophila)                                        |

**Table S3.** Clustered enrichment analysis of GO terms describing biological processes (2 hours vs 8 hours) with an enrichment score cutoff of 1.5.

| UNIPROT<br>ACCESSION<br>NUMBER | GENE NAME                                                               |
|--------------------------------|-------------------------------------------------------------------------|
|                                | <b><u>Sodium ion transport</u></b>                                      |
| 414544                         | solute carrier family 20 (phosphate transporter), member 1              |
| 406910                         | solute carrier family 4, sodium bicarbonate cotransporter, member 7     |
| 382805                         | solute carrier family 4, sodium bicarbonate transporter-like, member 10 |
|                                | <b><u>Negative regulation of cellular protein metabolic process</u></b> |
| 390968                         | Jun oncogene                                                            |
| 413691                         | complement component (3b/4b) receptor 1-like                            |
| 389520                         | proteasome (prosome, macropain) subunit, alpha type 3                   |
| 384979                         | signal recognition particle 14                                          |
|                                | <b><u>Cytoplasmic vesicle membrane</u></b>                              |
| 404836                         | epsin 2                                                                 |
| 406037                         | phosphatidylinositol 4-kinase type 2 alpha                              |
| 397647                         | vesicle-associated membrane protein 2                                   |
|                                | <b><u>Inflammatory response</u></b>                                     |
| 413691                         | Complement component (3b/4b) receptor 1-like                            |
| 397143                         | Secreted phosphoprotein 1                                               |
| 407455                         | Small inducible cytokine subfamily E, member 1                          |
